# Supplementary material for: Effects of Fluoride and Calcium Phosphate-Based Varnishes in Children at High Risk of Tooth Decay: A Randomized Clinical Trial
Source: MDPI journal article supplement (doi:10.3390/ijerph181910049), 2021-09-24
Supplement: s1 [file s1]

# CLINICAL HISTORY

## FILIATION DATA.

- Name and Last name:
- Address (with postal code):
- Phone number:
- Email address:
- Place and date of birth:
- Parents' name:
- Parents' job:
- Number of siblings:

## ANAMNESIS.

- What happens?
- Since when?
- How does it happen?
- What do you attribute to?

## PREVIOUS MEDICAL HISTORY.

- Pregnancy and childbirth: ☐ caesarean section ☐ premature ☐ normal
- Mother's diseases during pregnancy:
- Treatments the mother underwent during pregnancy:
- Type of breastfeeding: ☐ maternal (duration in months) \_\_\_\_ ☐ artificial ☐ mixed
- Allergic problems:
- Is the child taking any medication?:
- Has the child had surgery for any reason ?:
- Does the child have any systematic disease (e.g. asma, celiac, heart diseases....)?
  - Since when?
  - What treatment do you receive or have you received?:

## GENERAL FAMILY HISTORY AND MOUTH.

- Hereditary diseases (Sdre. Down, class III, amelogenesis imperfecta ...):
- Family history of changes in the position of the jaws (Class III, etc.)
- How often do parents go to the dentist?  
☐ Annually ☐ Every two years ☐ More than two years
- Have parents ever had cavities? (Seals, extractions)  
☐ Caries more than two years ago ☐ Caries in the last year ☐ No caries

## ORAL HISTORY.

- Has the child already gone to the dentist?: ☐ yes ☐ no ☐ Generalist ☐ Pediatric dentist
- Describe the child's behavior:
- Why dental problems took the child to the dentist?:
- ☐ child uses fluoride toothpaste ..... ppm ☐ fluoride rinses ☐ fluoride tablets

- Previous treatments.
- Habits:
  - How many times does the child brush his/her teeth each day? ☐ None ☐ One ☐ Two ☐ More than two
  - At what time of the day do you brush your teeth? (several options are valid)
    - ☐ After breakfast ☐ After lunch ☐ After dinner ☐ Others
  - Food (fill in the diet sheet in Annex 1).
    - Breakfast place ☐ Home ☐ School ☐ Bar / Restaurant ☐ Other
    - Food place ☐ Home ☐ School ☐ Bar / Restaurant ☐ Other
    - Dinner place ☐ House ☐ School ☐ Bar / Restaurant ☐ Others
  - Do you drink bottled water? ☐ yes ☐ no What brand?
  - Has the child used a pacifier, bottle or bites his nails, for how long ?:

#### PSYCHOLOGICAL ASPECTS.

- Has the child suffered from psychological development disorders?:
- How would you define your child's behavior?: ☐ normal ☐ nervous ☐ consented ☐ capricious ☐ mature ☐ rebellious.

#### EXTRAORAL EXPLORATION.

- Functional examination: chewing, phonation and swallowing.
- Face scan:
  - Front view: symmetry, facial thirds and lip sealing.
  - Lateral view: profile and lip position.

#### INTRAORAL EXPLORATION.

- Halitosis (local or general):
- Mucosal exploration:
- Exploration of the gum:
- Exploration of the language:
- Examination of braces:
- Dental examination (changes in number, size, color, shape):
- Exploration of habits (atypical swallowing, digital suction and oral breathing):
- Orthodontic examination:
  - Anteroposterior relation (Angle class):
  - Cross relation:
  - Vertical relationship:
  - Dental anomalies:
  - Crowding:

CARIES RISK ASSESMENT:

- Low:
- Moderate:
- High:
- Extreme:

|                                                                                                                                                                          |                    |    |       |
|--------------------------------------------------------------------------------------------------------------------------------------------------------------------------|--------------------|----|-------|
| Initial/base line exam date                                                                                                                                              | Caries recall date |    |       |
|                                                                                                                                                                          | Yes                | No | Notes |
| 1. Caries Risk Indicators — Parent Interview**                                                                                                                           |                    |    |       |
| (a) Mother or primary caregiver has had active dental decay in the past 12 months                                                                                        |                    |    |       |
| (b) Child has recent dental restorations (see 5b below)                                                                                                                  |                    |    |       |
| (c) Parent and/or caregiver has low SES (socioeconomic status) and/or low health literacy                                                                                |                    |    |       |
| (d) Child has developmental problems                                                                                                                                     |                    |    |       |
| (e) No dental home/episodic dental care                                                                                                                                  |                    |    |       |
| 2. Caries Risk Factors (Biological) — Parent Interview**                                                                                                                 |                    |    |       |
| (a) Child has frequent (more than three times a day) between-meal snacks of sugars/cooked starch/sugared beverages                                                       |                    |    |       |
| (b) Child has saliva-reducing factors present, including:<br>1. Medications (e.g., some for asthma or hyperactivity)<br>2. Medical (cancer treatment) or genetic factors |                    |    |       |
| (c) Child continually uses bottle - contains fluids other than water                                                                                                     |                    |    |       |
| (d) Child sleeps with a bottle or nurses on demand                                                                                                                       |                    |    |       |
| 3. Protective Factors (Nonbiological) — Parent Interview                                                                                                                 |                    |    |       |
| (a) Mother/caregiver decay-free last three years                                                                                                                         |                    |    |       |
| (b) Child has a dental home and regular dental care                                                                                                                      |                    |    |       |
| 4. Protective Factors (Biological) — Parent Interview                                                                                                                    |                    |    |       |
| (a) Child lives in a fluoridated community or takes fluoride supplements by slowly dissolving or as chewable tablets                                                     |                    |    |       |
| (b) Child’s teeth are cleaned with fluoridated toothpaste (pea-size) daily                                                                                               |                    |    |       |
| (c) Mother/caregiver chews/sucks xylitol chewing gum/lozenges 2-4x daily                                                                                                 |                    |    |       |
| 5. Caries Risk Indicators/Factors — Clinical Examination of Child**                                                                                                      |                    |    |       |
| (a) Obvious white spots, decalcifications, or obvious decay present on the child’s teeth                                                                                 |                    |    |       |
| (b) Restorations placed in the last two years in/on child’s teeth                                                                                                        |                    |    |       |
| (c) Plaque is obvious on the child’s teeth and/or gums bleed easily                                                                                                      |                    |    |       |
| (d) Child has dental or orthodontic appliances present, fixed or removable: e.g., braces, space maintainers, obturators                                                  |                    |    |       |
| (e) Risk Factor: Visually inadequate saliva flow - dry mouth                                                                                                             |                    |    |       |

ICDAS REGISTRATION

Initial/base line exam date\_\_\_\_\_ Caries recall date\_\_\_\_\_

Age

| UPPER RIGHT |    |    |    |    |    |    |    |    | UPPER LEFT |    |    |    |    |    |    |    |   |
|-------------|----|----|----|----|----|----|----|----|------------|----|----|----|----|----|----|----|---|
|             |    |    |    | 55 | 54 | 53 | 52 | 51 | 61         | 62 | 63 | 64 | 65 |    |    |    |   |
|             | 18 | 17 | 16 | 15 | 14 | 13 | 12 | 11 | 21         | 22 | 23 | 24 | 25 | 26 | 27 | 28 |   |
| M           |    |    |    |    |    |    |    |    |            |    |    |    |    |    |    |    | M |
| O           |    |    |    |    |    |    |    |    |            |    |    |    |    |    |    |    | O |
| D           |    |    |    |    |    |    |    |    |            |    |    |    |    |    |    |    | D |
| B           |    |    |    |    |    |    |    |    |            |    |    |    |    |    |    |    | B |
| L           |    |    |    |    |    |    |    |    |            |    |    |    |    |    |    |    | L |
|             |    |    |    |    |    |    |    |    |            |    |    |    |    |    |    |    |   |

| LOW RIGHT |    |    |    |    |    |    |    |    | LOW LEFT |    |    |    |    |    |    |  |   |
|-----------|----|----|----|----|----|----|----|----|----------|----|----|----|----|----|----|--|---|
|           |    |    |    | 85 | 84 | 83 | 82 | 81 | 71       | 72 | 73 | 74 | 75 |    |    |  |   |
|           | 48 | 47 | 46 | 45 | 44 | 43 | 42 | 41 | 31       | 32 | 33 | 34 | 35 | 36 | 37 |  |   |
| M         |    |    |    |    |    |    |    |    |          |    |    |    |    |    |    |  | M |
| O         |    |    |    |    |    |    |    |    |          |    |    |    |    |    |    |  | O |
| D         |    |    |    |    |    |    |    |    |          |    |    |    |    |    |    |  | D |
| B         |    |    |    |    |    |    |    |    |          |    |    |    |    |    |    |  | B |
| L         |    |    |    |    |    |    |    |    |          |    |    |    |    |    |    |  | L |
|           |    |    |    |    |    |    |    |    |          |    |    |    |    |    |    |  |   |

SALIVA COLLECTION

|                                                           |                          |
|-----------------------------------------------------------|--------------------------|
| 1. Collect approximately 3.5 mL of saliva                 | YES NO                   |
| 2. Time sampling                                          | ___h___min               |
| 3. How long does it take to collect the sample?           | _____min                 |
| 4. Report presence of any disease or injury in the mouth. | YES Specify: _____<br>NO |
| 5. Brushed his/her teeth before coming                    | YES Specify: _____<br>NO |
| 6. Has eaten or drank anything?                           | YES Specify: _____<br>NO |

PLAQUE INDEX

|                          |        |
|--------------------------|--------|
| 1. TRIPLAQUE measurement | YES NO |
| 2. Photos                | YES NO |

|                        |        |
|------------------------|--------|
| 1. Paste check         | YES NO |
| 2. Toothbrushing check | YES NO |

# TREATMENT TRACKING SHEET

[illegible]
